# Supplementary material for: Does acute aerobic exercise enhance selective attention, working memory, and problem-solving abilities in Alzheimer's patients? A sex-based comparative study
Source: PubMed Central journal article supplement (PMC11187274; doi:10.3389/fspor.2024.1383119), 2024-06-06
Supplement: Datasheet1.pdf [file Datasheet1.pdf]

**Supplementary file**
**Table S1:** Intergroup comparisons of physical activity and control before activity (pedaling or reading) in Alzheimer's disease patients

|                                     | <b>Physical Activity Group<br/>(n=27)</b> |           | <b>Reading Activity Group<br/>(n=26)</b> |           | <i>p</i> |
|-------------------------------------|-------------------------------------------|-----------|------------------------------------------|-----------|----------|
|                                     | <i>M</i>                                  | <i>SD</i> | <i>M</i>                                 | <i>SD</i> |          |
| <b>Stroop (Interference Score)</b>  | 9.85                                      | 1.20      | 10.31                                    | 1.46      | 0.24     |
| <b>Hanoi (time en secondes)</b>     | 90.66                                     | 7.76      | 91.5                                     | 8.11      | 0.73     |
| <b>Hanoi (number of moves)</b>      | 13.89                                     | 0.58      | 13.19                                    | 2.28      | 0.61     |
| <b>Memory (digit span forward)</b>  | 3.17                                      | 0.18      | 3.21                                     | 0.16      | 0.32     |
| <b>Memory (digit span backward)</b> | 2.82                                      | 0.16      | 2.81                                     | 0.17      | 0.86     |

**Table S2:** Intergroup comparisons of physical and post-activity control (pedaling and reading) in Alzheimer's disease patients

|                                     | <b>Physical Activity Group<br/>(n=27)</b> |                  | <b>Reading Activity Group<br/>(n=26)</b> |                  | <b><i>P</i></b> |
|-------------------------------------|-------------------------------------------|------------------|------------------------------------------|------------------|-----------------|
|                                     | <b><i>M</i></b>                           | <b><i>SD</i></b> | <b><i>M</i></b>                          | <b><i>SD</i></b> |                 |
| <b>Stroop (Interference Score)</b>  | 8.11                                      | 0.84             | 10.65                                    | 1.44             | 0.000           |
| <b>Hanoi (time en secondes)</b>     | 81.41                                     | 8.45             | 94.73                                    | 10.51            | 0.000           |
| <b>Hanoi (number of moves)</b>      | 11.93                                     | 3.26             | 12.12                                    | 3.17             | 0.59            |
| <b>Memory (digit span forward)</b>  | 3.37                                      | 0.16             | 3.15                                     | 0.18             | 0.000           |
| <b>Memory (digit span backward)</b> | 3.15                                      | 0.15             | 2.79                                     | 0.11             | 0.000           |

**Table S3:** Within-group comparison of physical activity and pre- and post-activity (pedaling or reading) control in Alzheimer's disease patients

|                                     | Physical Activity Group<br>(n=27) |                 |          | Reading Activity Group<br>(n=26) |                  |          |
|-------------------------------------|-----------------------------------|-----------------|----------|----------------------------------|------------------|----------|
|                                     | Pre-activity                      | Post-activity   | <i>p</i> | Pre-activity                     | Post-activity    | <i>p</i> |
|                                     | <i>M (SD)</i>                     | <i>M (SD)</i>   |          | <i>M (SD)</i>                    | <i>M (SD)</i>    |          |
| <b>Stroop (Interference Score)</b>  | 9.85<br>(1.20)                    | 8.11<br>(0.85)  | 0.000    | 10.31<br>(1.46)                  | 10.65<br>(1.44)  | 0.97     |
| <b>Hanoi (time in seconds)</b>      | 90.66<br>(7.76)                   | 81.41<br>(7.76) | 0.000    | 91.5<br>(8.11)                   | 94.73<br>(10.51) | 0.99     |
| <b>Hanoi (number of moves)</b>      | 13.89<br>(0.58)                   | 11.93<br>(8.45) | 0.004    | 13.19<br>(2.28)                  | 12.12<br>(3.17)  | 0.09     |
| <b>Memory (digit span forward)</b>  | 3.17<br>(0.18)                    | 3.37<br>(0.16)  | 0.000    | 3.21<br>(0.16)                   | 3.15<br>(0.18)   | 0.96     |
| <b>Memory (digit span backward)</b> | 2.82<br>(0.16)                    | 3.15<br>(0.15)  | 0.000    | 2.81<br>(0.17)                   | 2.79<br>(0.11)   | 0.94     |

M: mean, SD: standard deviation
